# Supplementary material
Source: publisher figshare collection journal article supplement (https://diabetesjournals.figshare.com/articles/dataset/_/26364676)

# Supplemental Figure 1: Differentiation of stem cell-derived beta-like cells

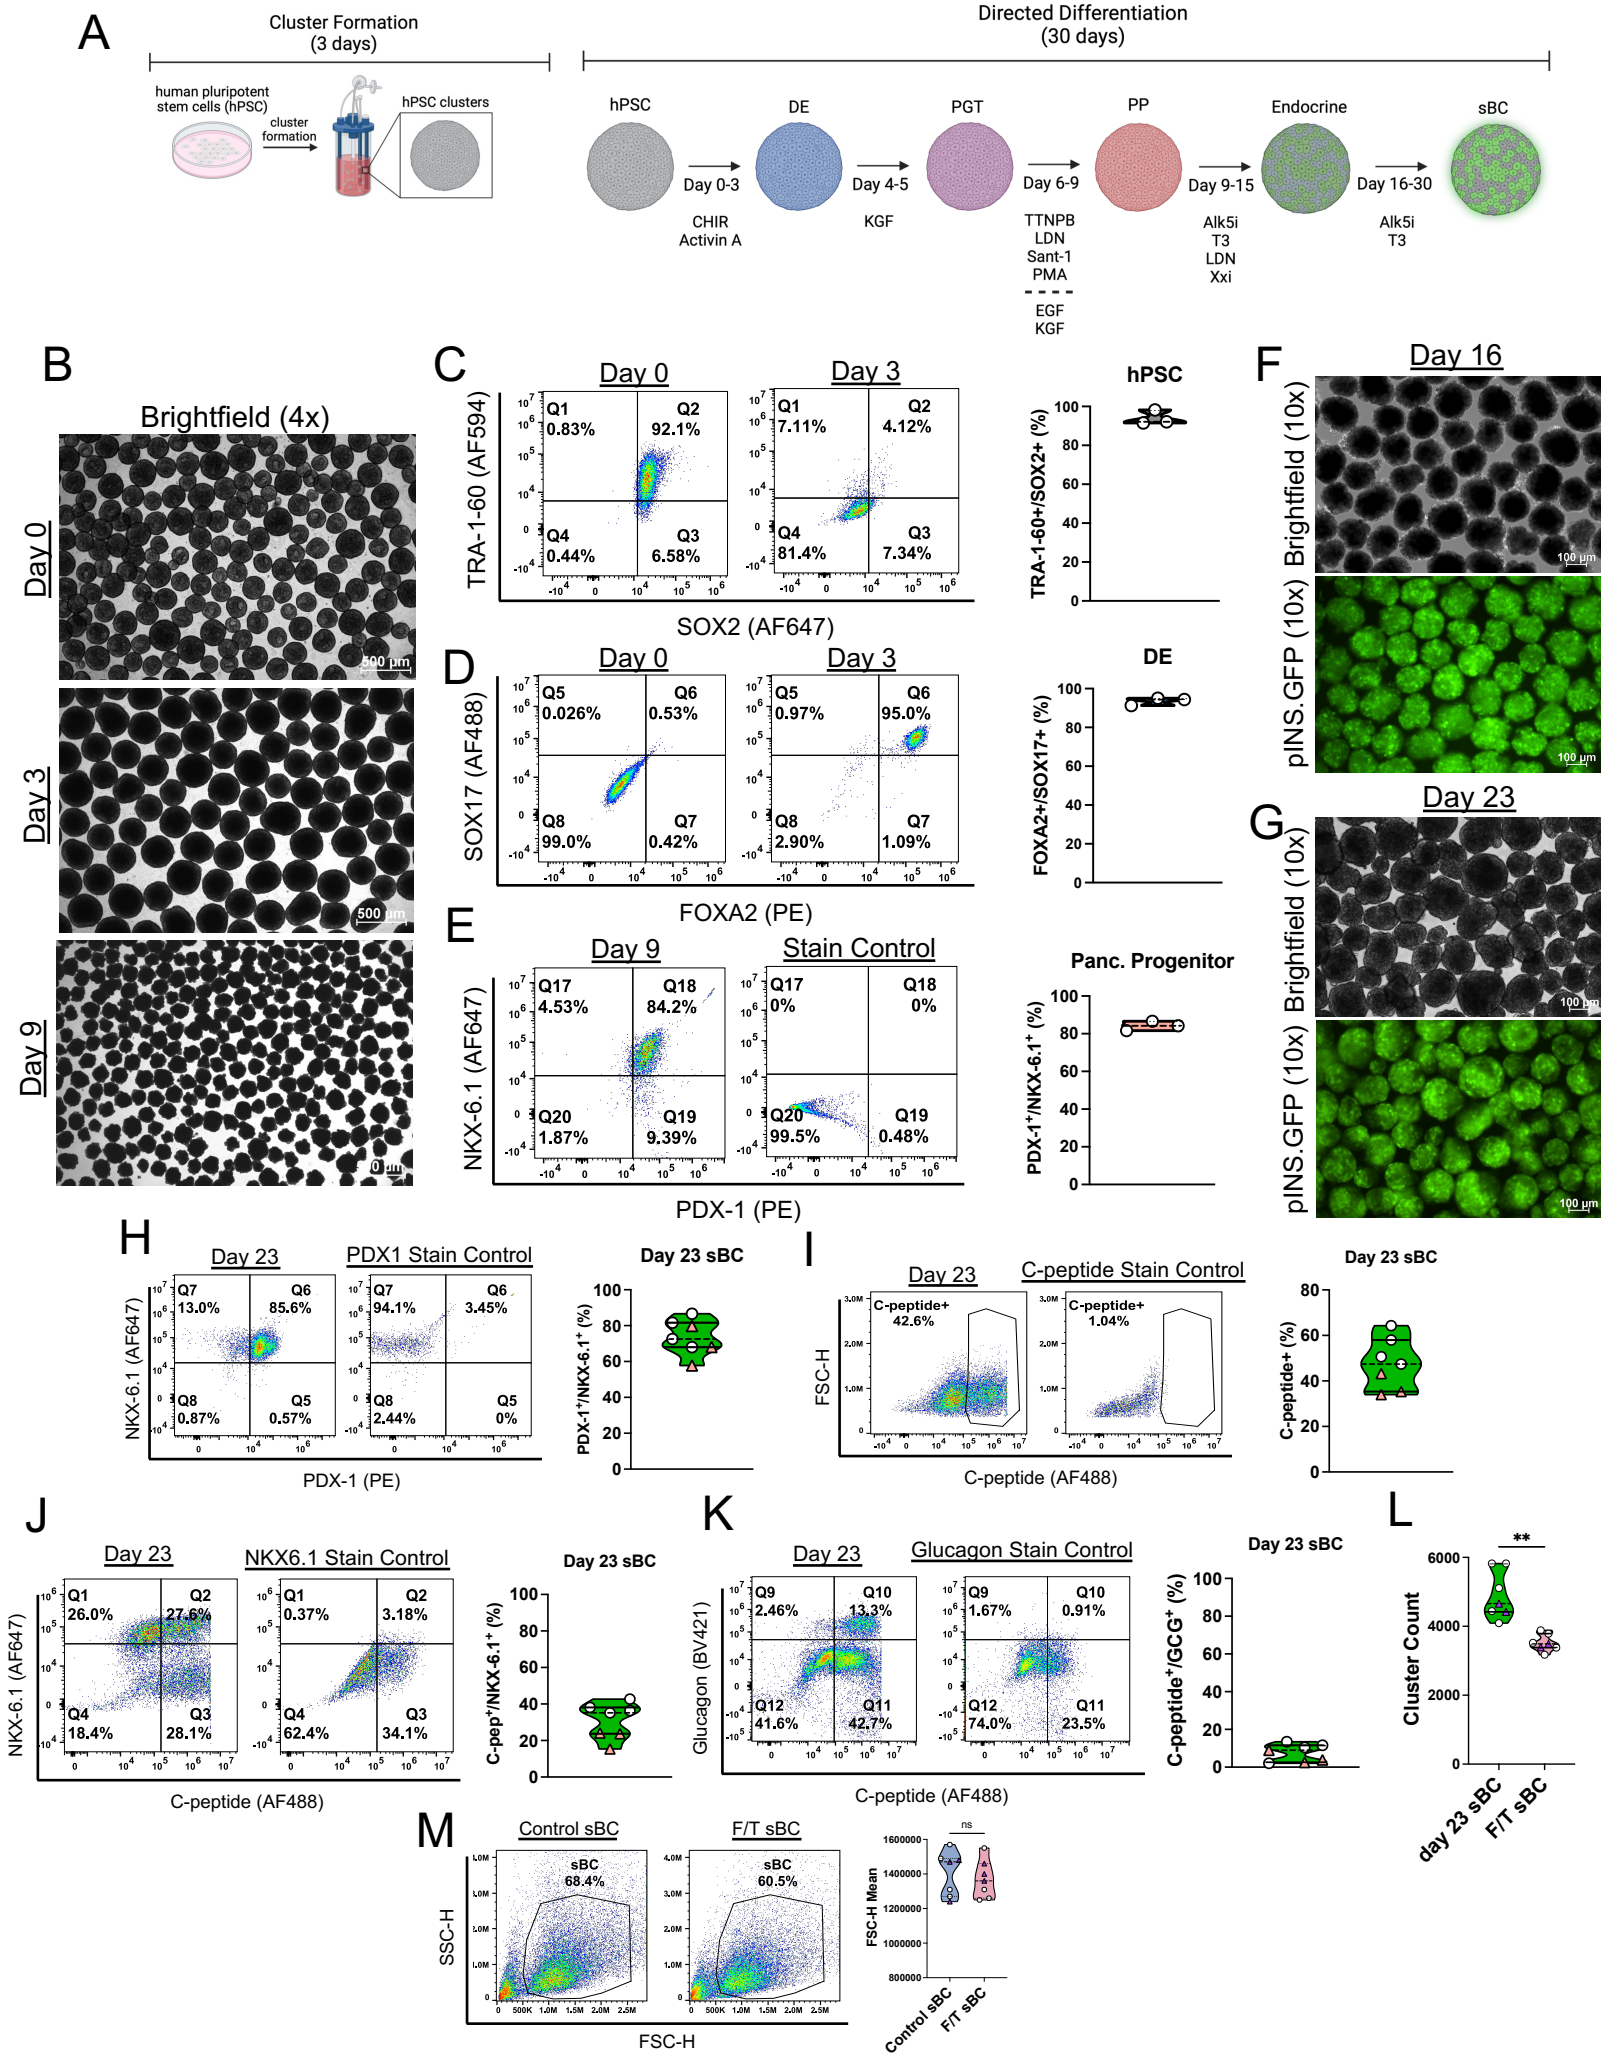

# Supplemental Figure 2: Single cell RNA sequencing reveals distinct cell populations

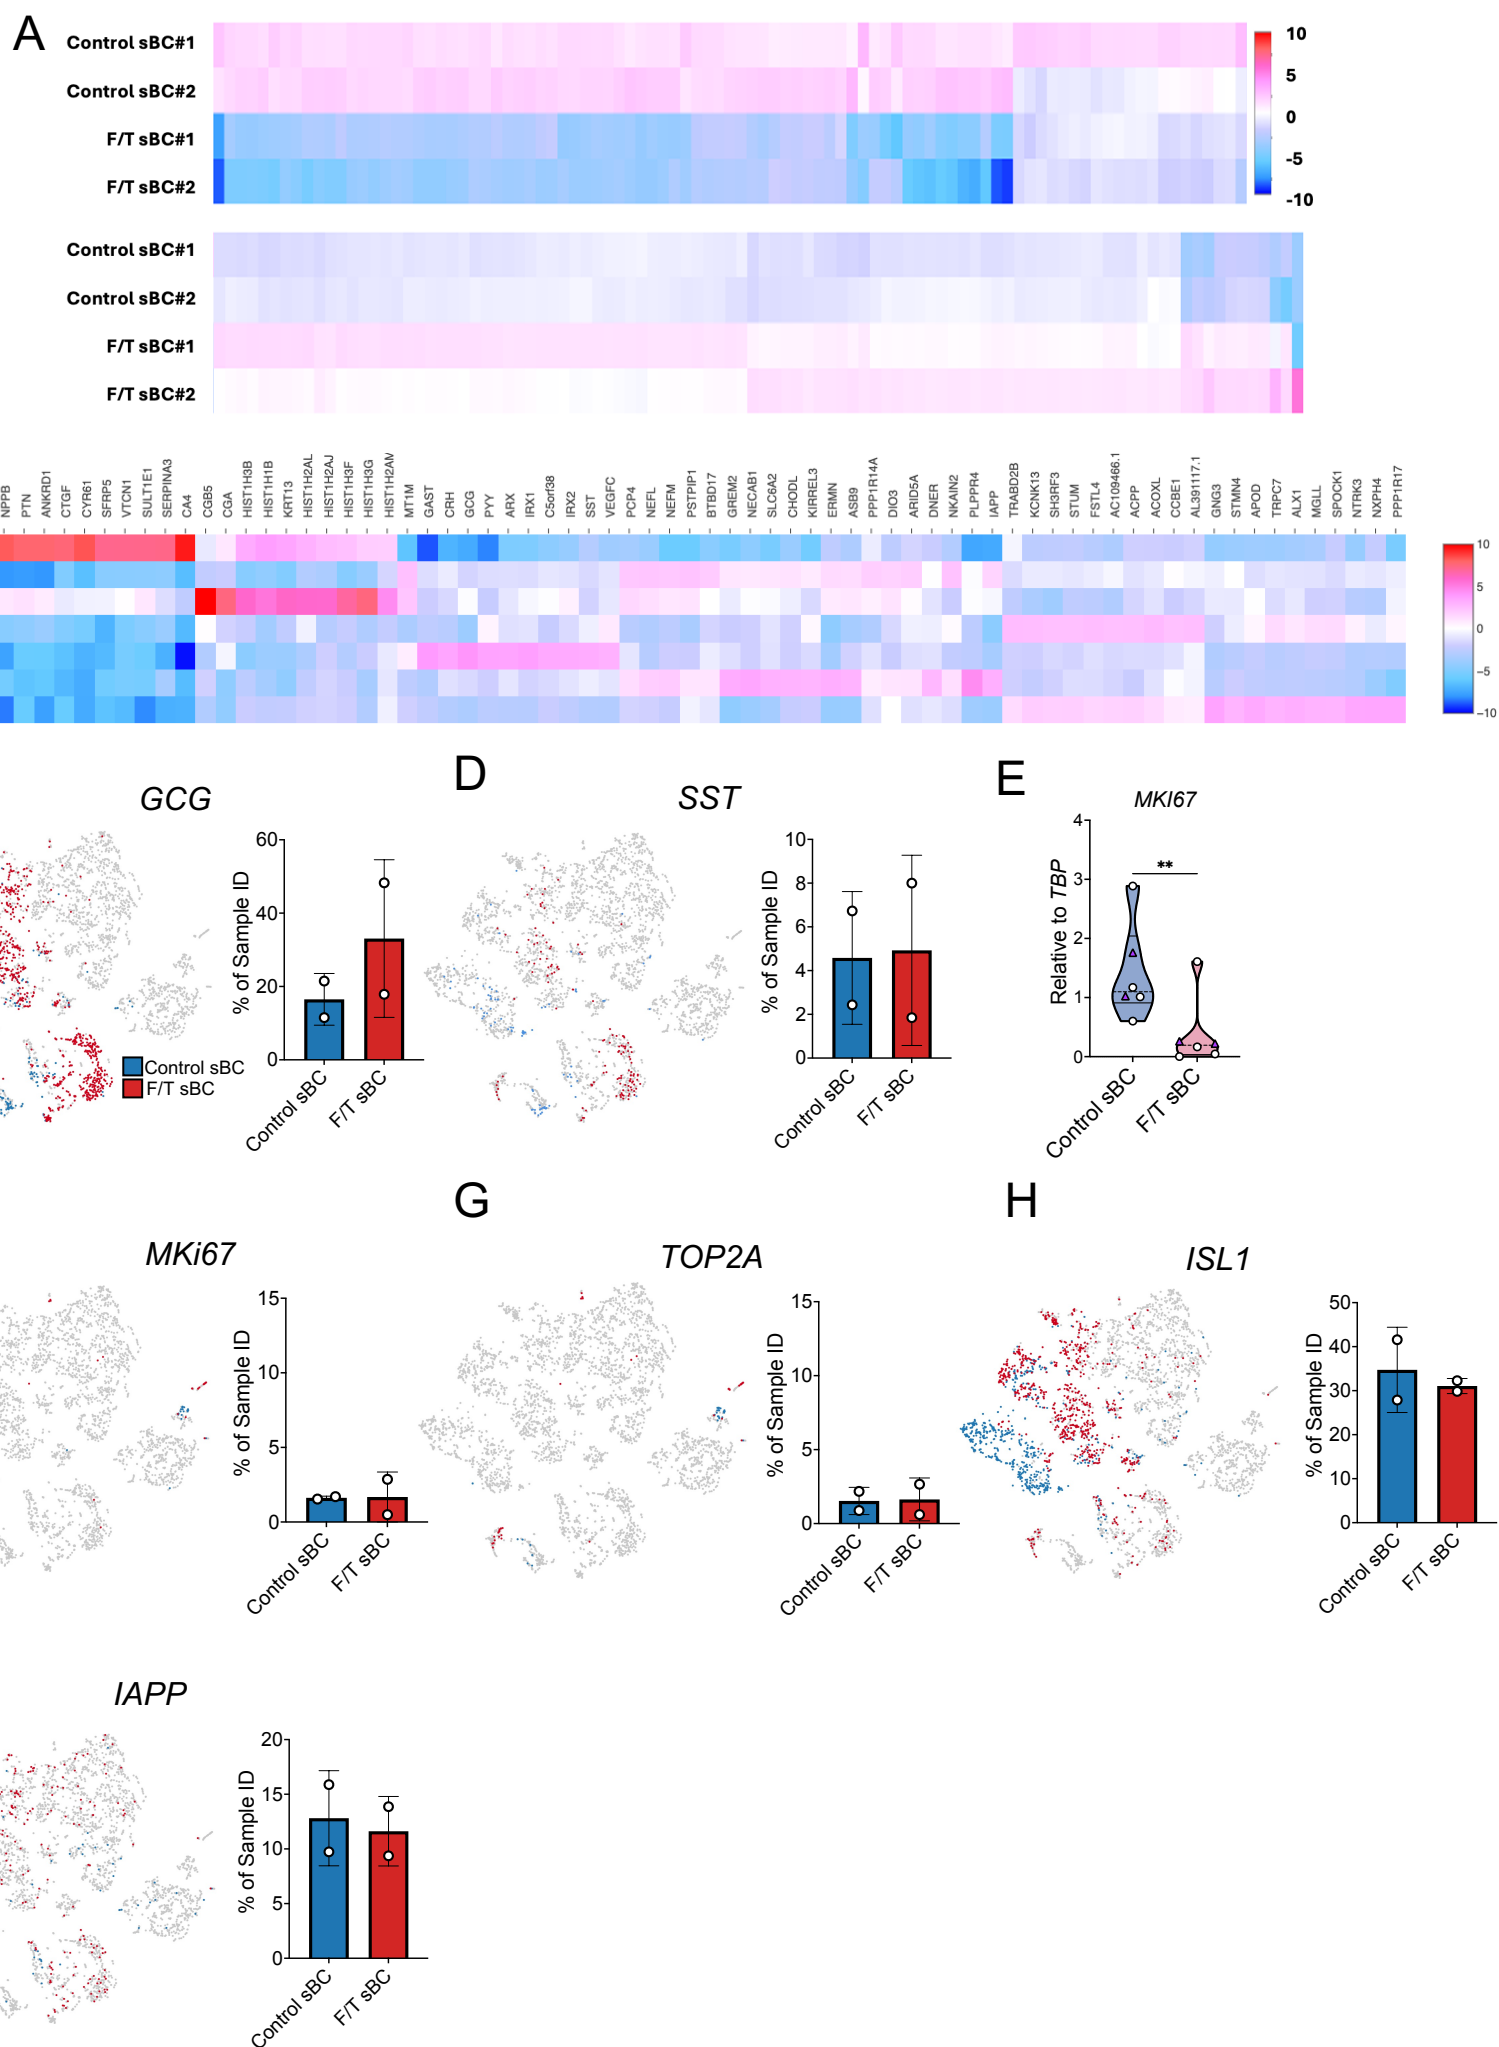

**Supplemental Figure 3: Single cell RNA sequencing displays minimal enterochromaffin cell signatures**

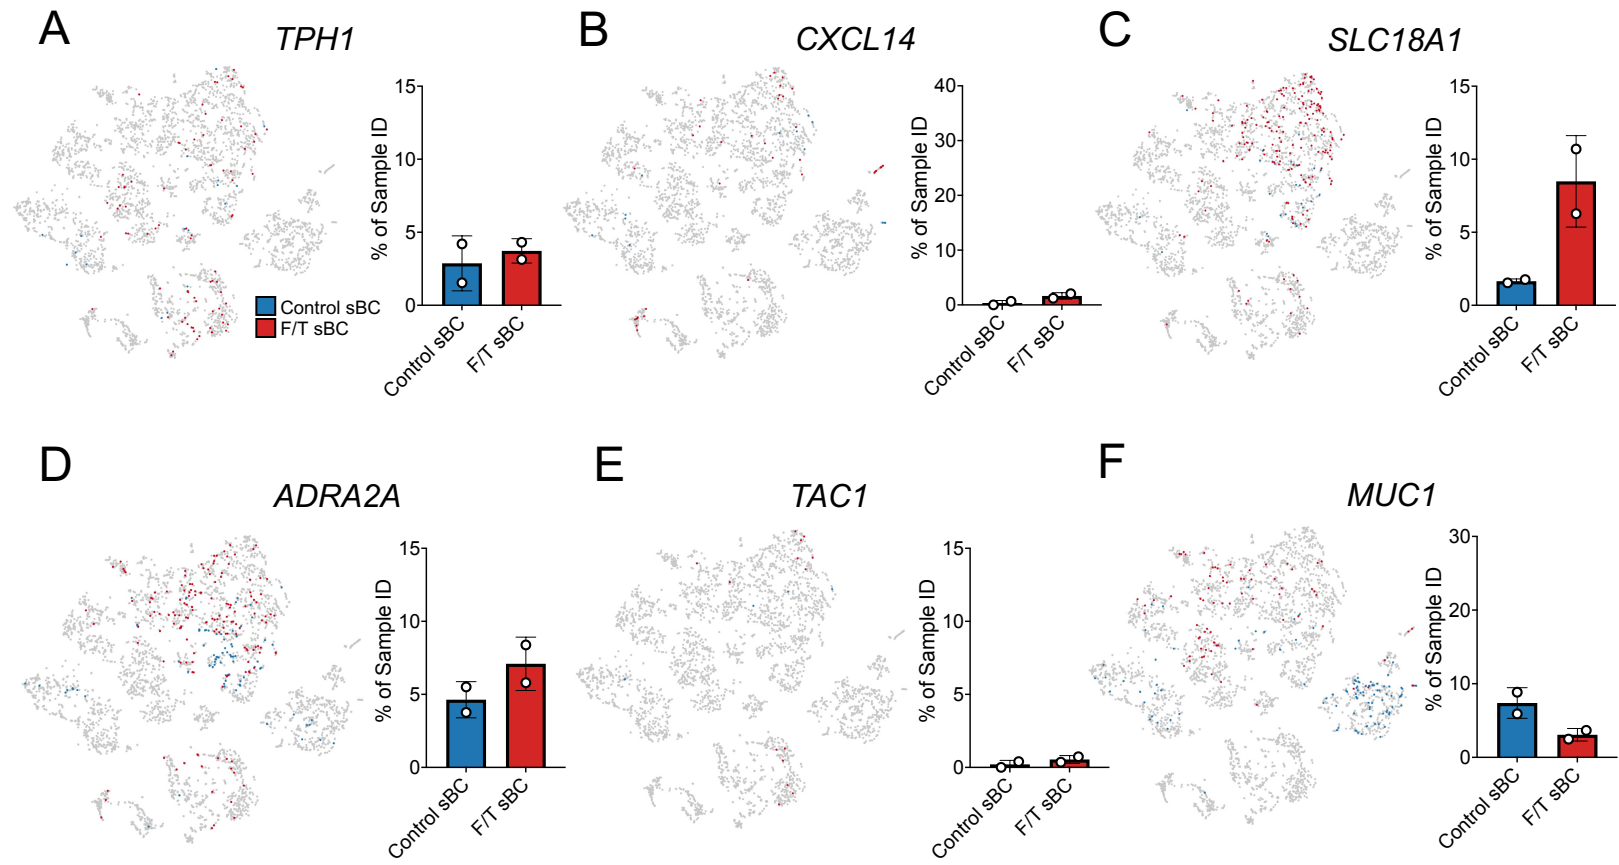

Supplement: Supplementary file 1 [file 1]
