# Supplementary material
Source: publisher figshare collection journal article supplement (https://diabetesjournals.figshare.com/articles/dataset/_/26364676)
Supplement: Supplementary file 3 [file 1]

## Supplemental Information for: Cryopreservation of stem cell-derived beta-like cells enriches for insulin-producing cells with improved function

### Supplemental Figure Legends:

#### Supplemental Figure 1: hPSC efficiently differentiate into stem cell-derived beta-like cells.

**A)** Schematic of cluster formation and differentiation of hPSCs into sBC. **B)** Representative live brightfield (BF) images of clusters on day 0, day 3, and day 9. **C-E)** Representative flow cytometry plot and flow quantification of SOX2 and TRA-1-60 expression on day 0 (**C**), SOX17 and FOXA2 expression on day 3 (**D**), and PDX-1 and NKX-6.1 expression on day 9 (**E**) of the differentiation protocol. **F&G)** Representative live brightfield (BF) and GFP insulin reporter (pINS.GFP) images of clusters on day 16 and day 23 of differentiation. **H-K)** Flow cytometry analysis of PDX1<sup>+</sup> NKX6.1<sup>+</sup> (**H**), C-peptide<sup>+</sup> (**I**), C-peptide<sup>+</sup> NKX6.1<sup>+</sup> (**J**), and C-peptide<sup>+</sup> Glucagon<sup>+</sup> frequencies on day 23 of differentiation. **L)** Quantification of total cluster count on day 23 (prior to freezing) and on day 30 in F/T sBC. **M)** Representative flow cytometry plot and cumulative quantification of the FSC-H (size) of day 30 control or F/T sBC. Data is representative of 3-7 independent experiments. White circles indicate ESC, triangles indicate iPSC.

#### Supplemental Figure 2: Single cell RNA sequencing reveals distinct cell populations.

**A)** Heatmap of 200 differentially expressed genes between samples. **B)** Heatmap of 10 most differentially regulated genes in different clusters from single cell RNA sequencing experiment. **C-D)** t-SNE plot of positive reads and quantification of frequency of events/sample ID for expression of *GCG* and *SST*. **E)** Normalized gene expression analysis of *MKI67* by qPCR in control or F/T sBC on day 30. Purple triangles indicate iPSC-derived sBC, white circles indicate ESC-derived sBC. Data is from 6 independent experiments. Data analyzed by paired t-test. \*\*  $p < 0.01$ . **F-I)** t-SNE plot of positive reads and quantification of frequency of events/sample ID for expression of *MKI67*, *TOP2A*, *ISL1*, and *IAPP*.

#### Supplemental Figure 3: Single cell RNA sequencing reveals distinct cell populations.

**A-F)** t-SNE plot of positive reads and quantification of frequency of events/sample ID for expression of *TPH1*, *CXCL14*, *SCL18A1*, *ADRA2A*, *TAC1*, and *MUC1*.

### Supplemental Tables:

Supplemental Table 1: List of antibodies and dyes used for flow cytometry

| Antigen   | Clone      | Fluorophore | Dilution | Vendor          | Catalog # |
|-----------|------------|-------------|----------|-----------------|-----------|
| TRA-1-60  | TRA-1-60-R | AF647       | 1:100    | BioLegend       | 330606    |
| SOX2      | 14A6A34    | AF594       | 1:100    | BioLegend       | 656106    |
| SOX17     | P7-969     | AF488       | 1:200    | BD Biosciences  | 562205    |
| FOXA2     | N17-280    | PE          | 1:200    | BD Biosciences  | 561589    |
| C-peptide | C-PEP-01   | AF488*      | 1:300    | Origene         | BM270     |
| NKX-6.1   | R11-560    | AF647       | 1:50     | BD Biosciences  | 563338    |
| PDX-1     | 658A5      | PE          | 1:50     | BD Biosciences  | 562161    |
| SOX9      | polyclonal | AF350*      | 1:50     | Millipore Sigma | AB5535    |
| Glucagon  | U16-850    | BV421       | 1:500    | BD Biosciences  | 565891    |

\* antibodies were conjugated in house

Supplemental Table 2: List of antibodies and dyes used for immunofluorescence

| Antigen               | Clone      | Fluorophore | Dilution | Vendor          | Catalog # |
|-----------------------|------------|-------------|----------|-----------------|-----------|
| Insulin               | Polyclonal | N/A         | 1:10     | DAKO            | A0564     |
| PDX-1                 | Polyclonal | N/A         | 1:200    | R&D Systems     | AF2419    |
| NKX-6.1               | F55A10     | N/A         | 1:200    | DSHB            | F55A10    |
| Glucagon              | K79bb10    | N/A         | 1:2000   | Millipore Sigma | G2654     |
| Human Nuclear Antigen | 235-1      | PE          | 1:200    | Abcam           | ab191181  |
| NKX-2.2               | 74.5A5     | N/A         | 1:20     | DSHB            | 74.5A5    |
| Synaptophysin         | Snp88      | N/A         | 1:50     | BioGenex        | MU363-UC  |

|                |            |       |        |                 |        |
|----------------|------------|-------|--------|-----------------|--------|
| SOX9           | Polyclonal | N/A   | 1:1000 | Millipore Sigma | AB5535 |
| Mouse IgG      | polyclonal | AF647 | 1:500  | ThermoFisher    | A31571 |
| Goat IgG       | Polyclonal | AF555 | 1:500  | ThermoFisher    | A21432 |
| Guinea pig IgG | Polyclonal | AF488 | 1:500  | ThermoFisher    | A11073 |

Supplemental Table 3: List of primers used for quantitative PCR.

| <b>Probe</b> | <b>Vendor</b> | <b>Catalog #</b> |
|--------------|---------------|------------------|
| <i>INS</i>   | BioRad        | qHsaCPE5192383   |
| <i>GCG</i>   | BioRad        | qHsaCEP0050851   |
| <i>SST</i>   | BioRad        | qHsaCPE5046148   |
| <i>MKi67</i> | BioRad        | qHsaCPE5050322   |
| <i>TBP</i>   | BioRad        | qHsaCIP0036255   |

Supplemental Table 4: List of UMI thresholds for single cell RNA sequencing

| <b>Gene</b> | <b>LogUMINorm Range</b> |
|-------------|-------------------------|
| INS         | 3-8                     |
| GCG         | 3-9                     |
| SST         | 3-9                     |
| FEV         | 3-5                     |
| ENTPD3      | 0.1-4                   |
| IAPP        | 0.1-6                   |
| SOX9        | 0.5-4                   |

|         |       |
|---------|-------|
| CHGA    | 3-9   |
| NKX6.1  | 0.5-4 |
| PDX1    | 0.5-4 |
| TPH1    | 3-5   |
| ISL1    | 0.5-4 |
| NUEROD1 | 0.5-5 |
| NKX2.2  | 0.5-4 |
| MKi67   | 1-4   |
| TOP2A   | 1-4   |
| SLC18A1 | 1-4   |
| ADRA2A  | 1-3   |
| TAC1    | 1-4   |
| CXCL14  | 1-4   |
| MUC1    | 1-3   |

Supplemental Table 5: Top 10 differentially expressed genes per cluster within t-sne plot

| Gene      | Cluster 1<br>Log2 Fold<br>Change | Cluster 2<br>Log2 Fold<br>Change | Cluster 3<br>Log2 Fold<br>Change | Cluster 4<br>Log2 Fold<br>Change | Cluster 5<br>Log2 Fold<br>Change | Cluster 6<br>Log2 Fold<br>Change | Cluster 7<br>Log2 Fold<br>Change |
|-----------|----------------------------------|----------------------------------|----------------------------------|----------------------------------|----------------------------------|----------------------------------|----------------------------------|
| MFAP2     | 4.98483809                       | -3.2829503                       | 0.47968975                       | -3.655798                        | -3.6429391                       | -3.3988531                       | -2.661469                        |
| HSPG2     | 5.55684927                       | -3.7504126                       | -2.0553095                       | -2.7713501                       | -2.9996921                       | -2.9673279                       | -5.7768301                       |
| CYR61     | 8.35522632                       | -6.4822229                       | -0.5336771                       | -5.3461616                       | -6.9800042                       | -7.2534819                       | -7.3027632                       |
| VTCN1     | 7.25453394                       | -4.5886956                       | 0.09012092                       | -5.13931                         | -5.3181727                       | -5.2355135                       | -6.6794939                       |
| NOTCH2    | 5.86586927                       | -4.7515848                       | -0.9490407                       | -2.947646                        | -3.0767999                       | -4.4904334                       | -4.7858522                       |
| NES       | 5.85609164                       | -3.8031262                       | 1.59421706                       | -3.5818849                       | -5.7992798                       | -5.7529767                       | -3.2056844                       |
| KIRREL1   | 6.72817824                       | -4.6738008                       | -0.4556203                       | -2.4269171                       | -4.5515845                       | -5.1268746                       | -5.8981813                       |
| NR5A2     | 6.91533876                       | -4.316411                        | -0.8800689                       | -3.2092589                       | -5.4772794                       | -5.0092234                       | -6.4533317                       |
| PTPN14    | 6.22803312                       | -3.8958054                       | -0.6051841                       | -2.8263707                       | -3.8993476                       | -4.8864407                       | -5.466109                        |
| LINC01829 | 5.84877758                       | -3.9461198                       | -0.6549624                       | -1.486176                        | -4.3723682                       | -5.106966                        | -3.9826264                       |

### **Extended Detailed Methods:**

#### Single Cell RNA sequencing:

scRNA-seq libraries were sequenced via paired-end sequencing through the Illumina® Novaseq platform by Novogene Corporation Inc. Sequencing reads were uploaded to

10X Genomic's cloud analysis platform and processed with the Cell Ranger Count v7.1.0 pipeline using the Human GRCh38 v3.0.0 reference genome to create unique molecular identifier (UMI) gene count matrices per sample. These individual sample matrices were then aggregated together and processed using the 10X Genomics Loupe Browser v7.0.1 platform to perform filtering, normalization, clustering and to create t-SNE projections. Cells that contained a UMI count lower than 260 or higher than 200,000, had fewer than 20 or greater than 12,000 genes expressed, or a proportion of mitochondrial genes greater than 20% were removed from the analysis.

#### Kidney capsule transplantation of sBC:

Mice were first anesthetized with isoflurane, followed by lubricant application on the eyes and subcutaneous injections of analgesics (buprenorphine and meloxicam). After shaving and applying Nair, the surgical area was sterilized with povidone-iodine and alcohol swabs. The surgery was then performed aseptically, first by making an incision in the skin and then in the peritoneal layer. The kidney was then exposed and 1000 sBC transplanted into the kidney capsule. The kidney was returned to its original position, the peritoneal incision closed with surgical stitches, and the skin incision closed with surgical clips. Experimental animals were monitored and received additional subcutaneous injections of analgesics in the following days as per approved UF IACUC protocol.
